# Supplementary material for: Rationalisation of a thrombophilia panel using laboratory medicine Delphi-like consensus evaluation and secondary artificial intelligence-based simulation assessment
Source: publisher site journal article supplement (doi:10.1515/dx-2025-0144), 2026-01-12
Supplement: Supplementary file 1 [file j_dx-2025-0144_suppl_001.xlsx]

## Sheet: Sheet1
Parameter	Method	Reagent
Prothrombin Time	Coagulometric assay measuring clotting time after addition of thromboplastin and calcium ions	Thromborel® S, Siemens Healthineers
Activated Partial Thromboplastin Time	Coagulometric assay using ellagic acid and purified phospholipids to activate the intrinsic pathway	Dade® Actin® FSL, Siemens Healthineers
Thrombin Time	Coagulometric assay measuring conversion of fibrinogen to fibrin after addition of thrombin	BC® Thrombin Reagent, Siemens Healthineers
Antithrombin III	Chromogenic assay based on thrombin inhibition proportional to AT activity	INNOVANCE® Antithrombin, Siemens Healthineers
Activated Protein C-Resistance	Coagulometric assay comparing aPTT prolongation with and without activated protein C	ProC® Ac R, Siemens Healthineers
Protein C	Chromogenic assay using snake-venom-derived activator and chromogenic substrate	Berichrom® Protein C, Siemens Healthineers
Protein S	Immunoturbidimetric assay quantifying free protein S antigen	INNOVANCE® Free PS Ag, Siemens Healthineers
Lupus Anticoagulant	dRVVT-based screening and confirmation assays using Russell’s viper venom and phospholipids	LA 1 Screening / LA 2 Confirmation Reagent, Siemens Healthineers
Anticardiolipin IgG/IgM	Automated chemiluminescent immunoassay (magnetic particle-based)	HemosIL AcuStar Anti-Cardiolipin IgG/IgM, Werfen
Anti-β2-Glycoprotein I IgG/IgM	Automated chemiluminescent immunoassay (magnetic particle-based)	HemosIL AcuStar Anti-β2 Glycoprotein I IgG/IgM, Werfen
Factor V Leiden (G1691A)	Loop-mediated isothermal amplification (LAMP) with melting-curve analysis	LC-FVL-LP Kit, LaCAR MDx technologies
Prothrombin G20210A	LAMP with melting-curve analysis	LC-FII-LP Kit, LaCAR MDx technologies
MTHFR C677T (rs1801133)	LAMP with melting-curve analysis	LC-MTHFR-LP Kit, LaCAR MDx technologies
MTHFR A1298C (rs1801131)	LAMP with melting-curve analysis	LC-2ndMTHFR-LP Kit, LaCAR MDx technologies
PAI-1 4G/5G (rs1799762)	LAMP with melting-curve analysis	LC-PAI1-LP Kit, LaCAR MDx technologies
Homocysteine	Enzymatic assay	Cobas® Homocysteine, Roche Diagnostics
Anti-Annexin V IgG/IgM	Enzyme-linked immunosorbent assay (ELISA)	Anti-Annexin V ELISA (IgG/IgM), EUROIMMUN
Anti-Phosphatidylserine/Prothrombin IgG/IgM	ELISA	Anti-Phosphatidylserine/Prothrombin ELISA (IgG/IgM), EUROIMMUN
